# Supplementary material
Source: publisher site journal article supplement (https://www.dovepress.com/get_supplementary_file.php?f=432928.docx)
Supplement: Supplementary file 1 [file get_supplementary_file.php]

**Supporting information**

**Key Modulation of ROS and HSP for Effective Therapy against Hypoxic Tumor with Multifunctional Nanosystem**

Bangzhen Ma1 2 Yisheng Zhao3  Xiaoli Liu4 Mengping Huo2 Jinghong Wang2 Jiwei Ma2

Yang Zhang2*  Chengkun Qin1 2*

1 Shandong Provincial Hospital, Shandong University, Jinan, Shandong,250021, China.

2 Shandong Provincial Hospital Affiliated to Shandong First Medical University, Jinan, Shandong,250021, China.

3 School of Pharmaceutical Sciences, Key Laboratory for Natural Active Pharmaceutical Constituents Research in Universities of Shandong Province, Shandong Analysis and Test Center, Qilu University of Technology (Shandong Academy of Sciences), Jinan, Shandong,250353, China

4 Department of Hernia and Abdominal Wall Surgery, Beijing Chaoyang Hospital, Capital Medical University, Beijing, 100043, China.

*Correspondence: Chengkun Qin : Shandong Provincial Hospital,324 Jingwu Road, Huaiyin District, Jinan City, Shandong Province, China. <Tel:+86> 053168776159, Email: [qinchengkun_slyy@163.com](mailto:qinchengkun_slyy@163.com); Yang Zhang : Shandong Provincial Hospital,324 Jingwu Road, Huaiyin District, Jinan City, Shandong Province, China. <Tel:+86> 053168777846, Email:zhangyang@sdfmu.edu.cn.

**Supplementary Figure Legends**


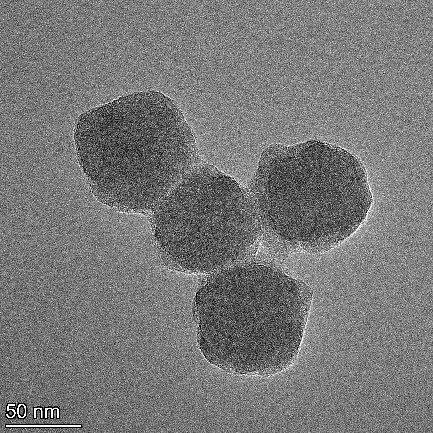


***Figure S1.*** *TEM images：Nanoparticle composites exhibit excellent dispersion characteristics under high-magnification TEM.*


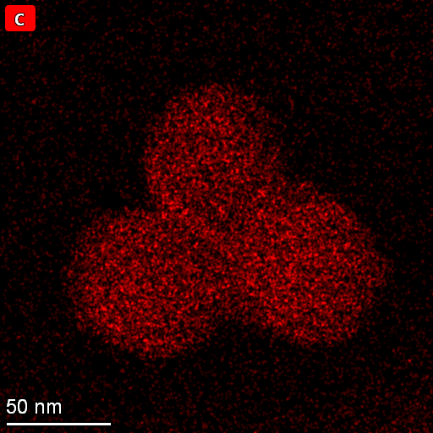


***Figure S2.*** *TEM images： the distribution of carbon elements*


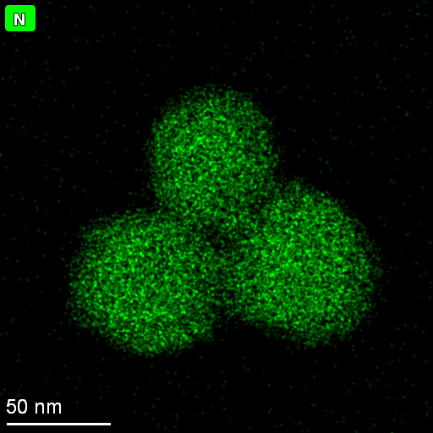


***Figure S3.*** *TEM images：.* *the distribution of nitrogen elements*


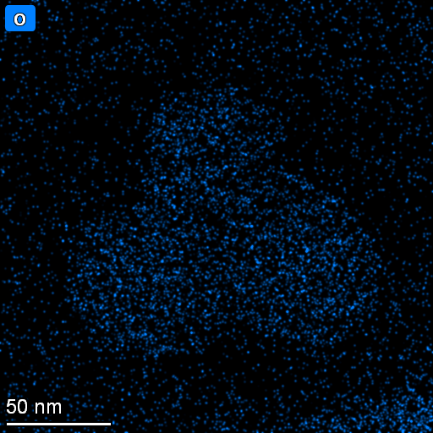


***Figure S4.*** *TEM images：the distribution of oxygen elements*


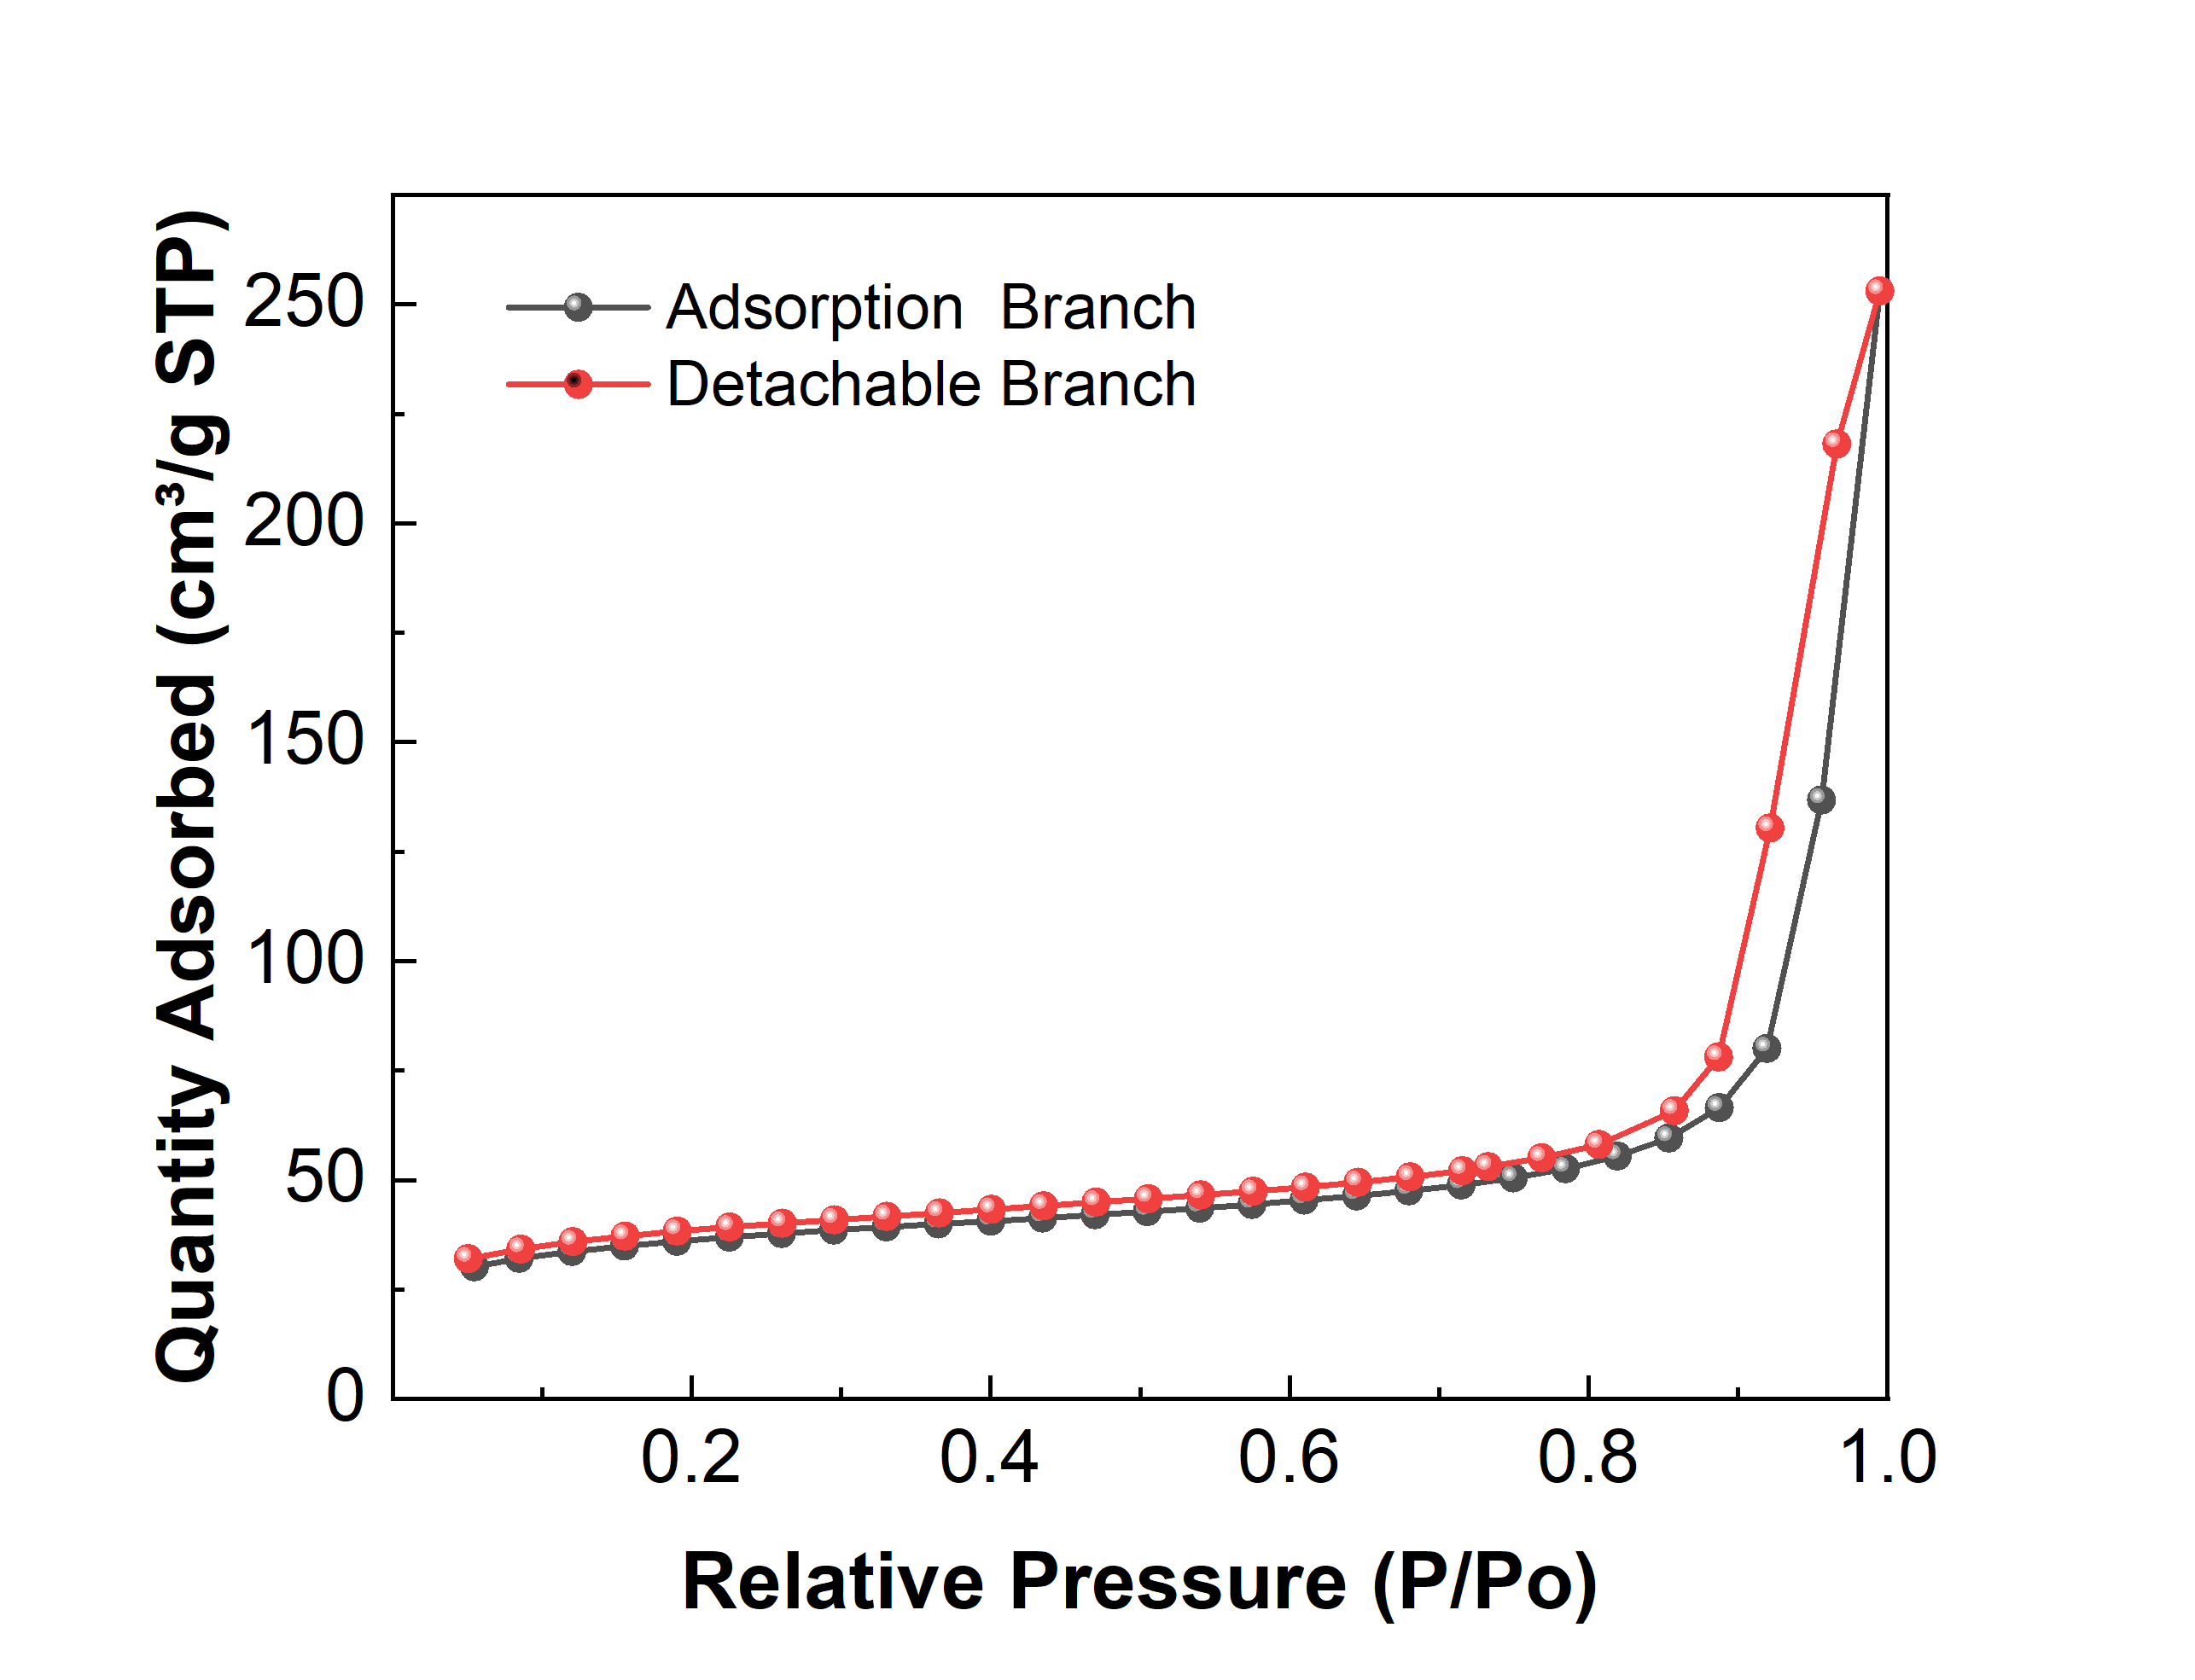


***Figure S5.*** *Analysis by the BET method revealed a significant hysteresis loop in the adsorption-desorption isotherm, indicating the presence of mesopores in the nanocomposite particles due to capillary condensation phenomenon.*


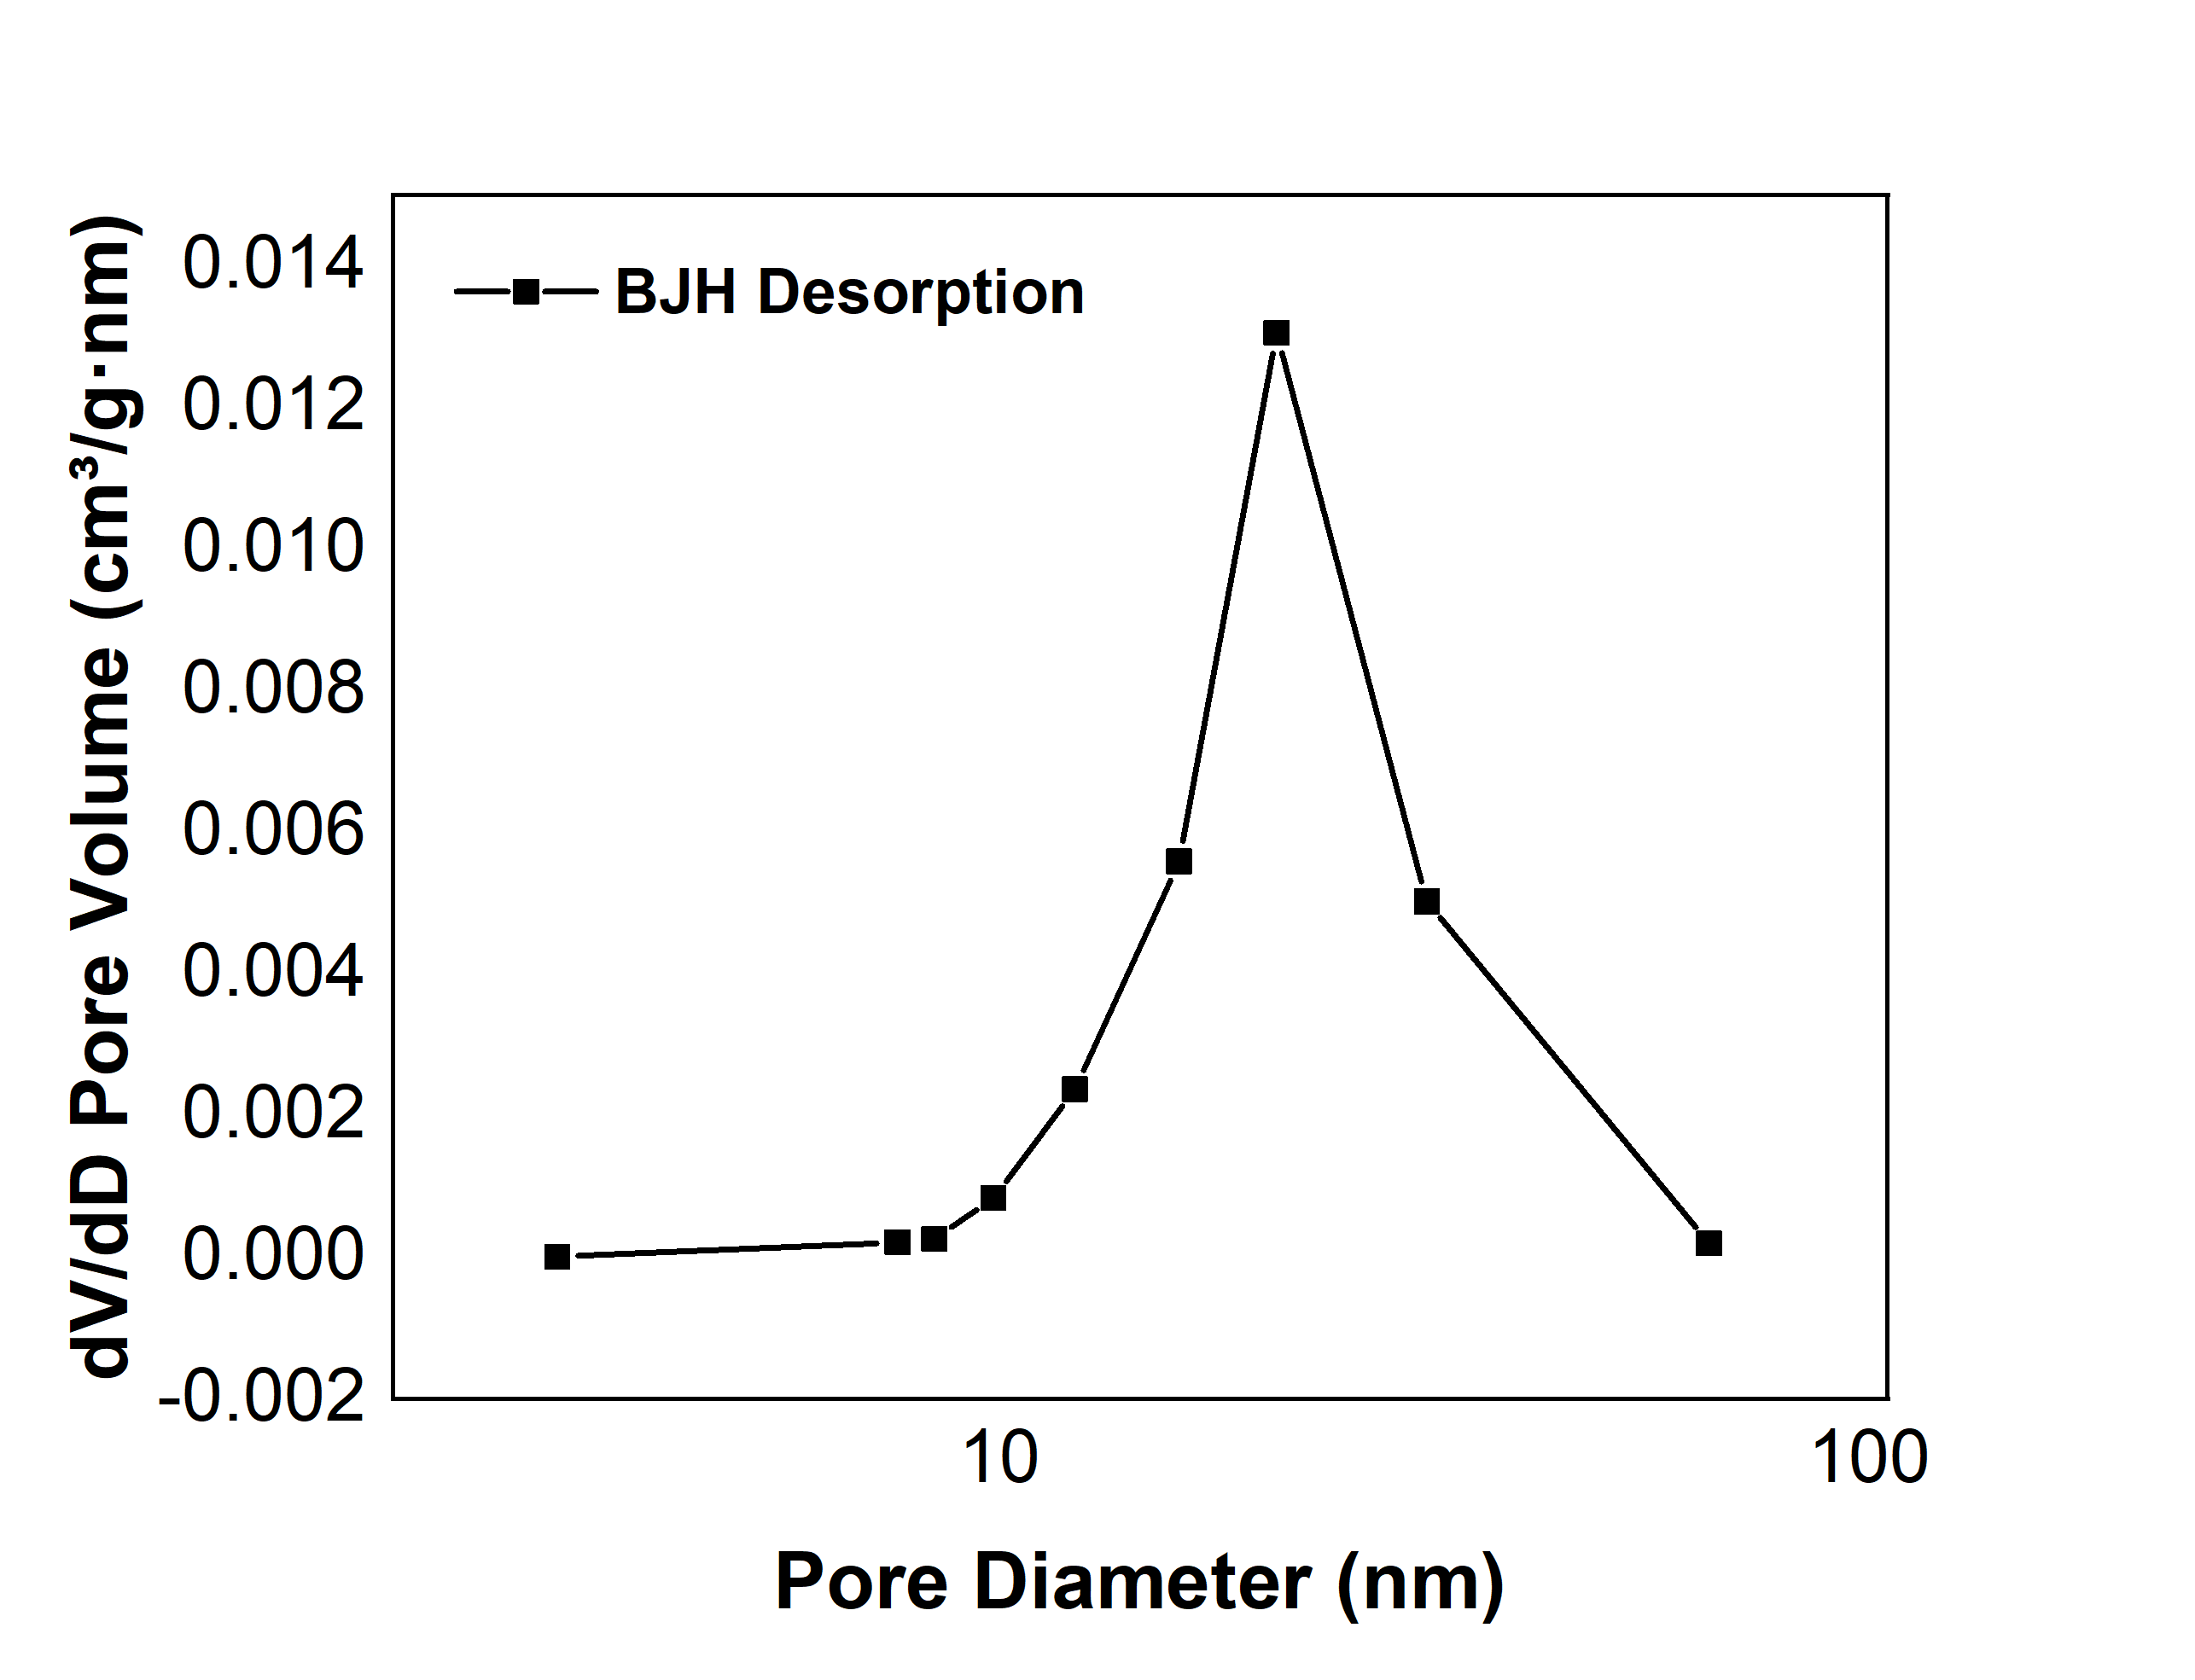


***Figure S6****. Analysis of the desorption branch curve using the BJH method revealed an average pore size of 26.8nm for the nanocomposite particles*





***Figure S7.*** *SEM images：* *The nanocomposite particles exhibit uniform size distribution with peak sizes centered around 100 nm.*


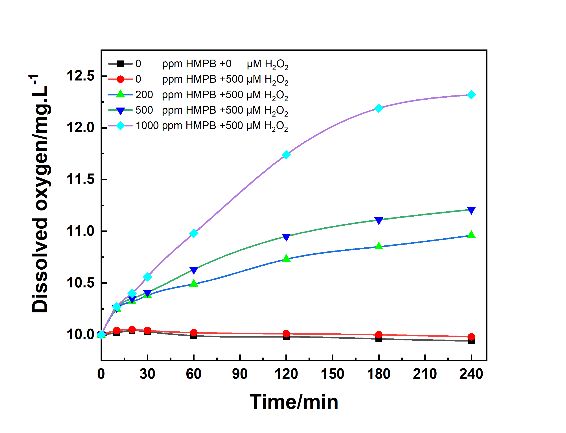


***Figure S8.*** *Curves showing the oxygen concentration versus time in a mixed solution containing H2O2 (500 μM) and HMPB at concentrations of 0, 200, 500, and 1,000 ppm.*


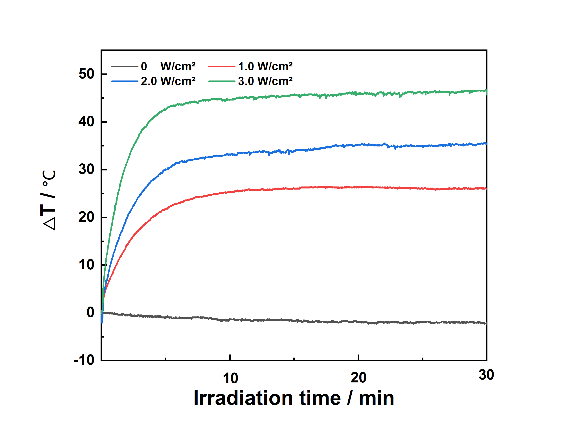


***Figure S9.*** *Curves showing the time-course temperature variation of the HMPB@TCPP-Cu solution upon irradiation at laser densities of 0, 1, 2, and 3 W/cm2.*


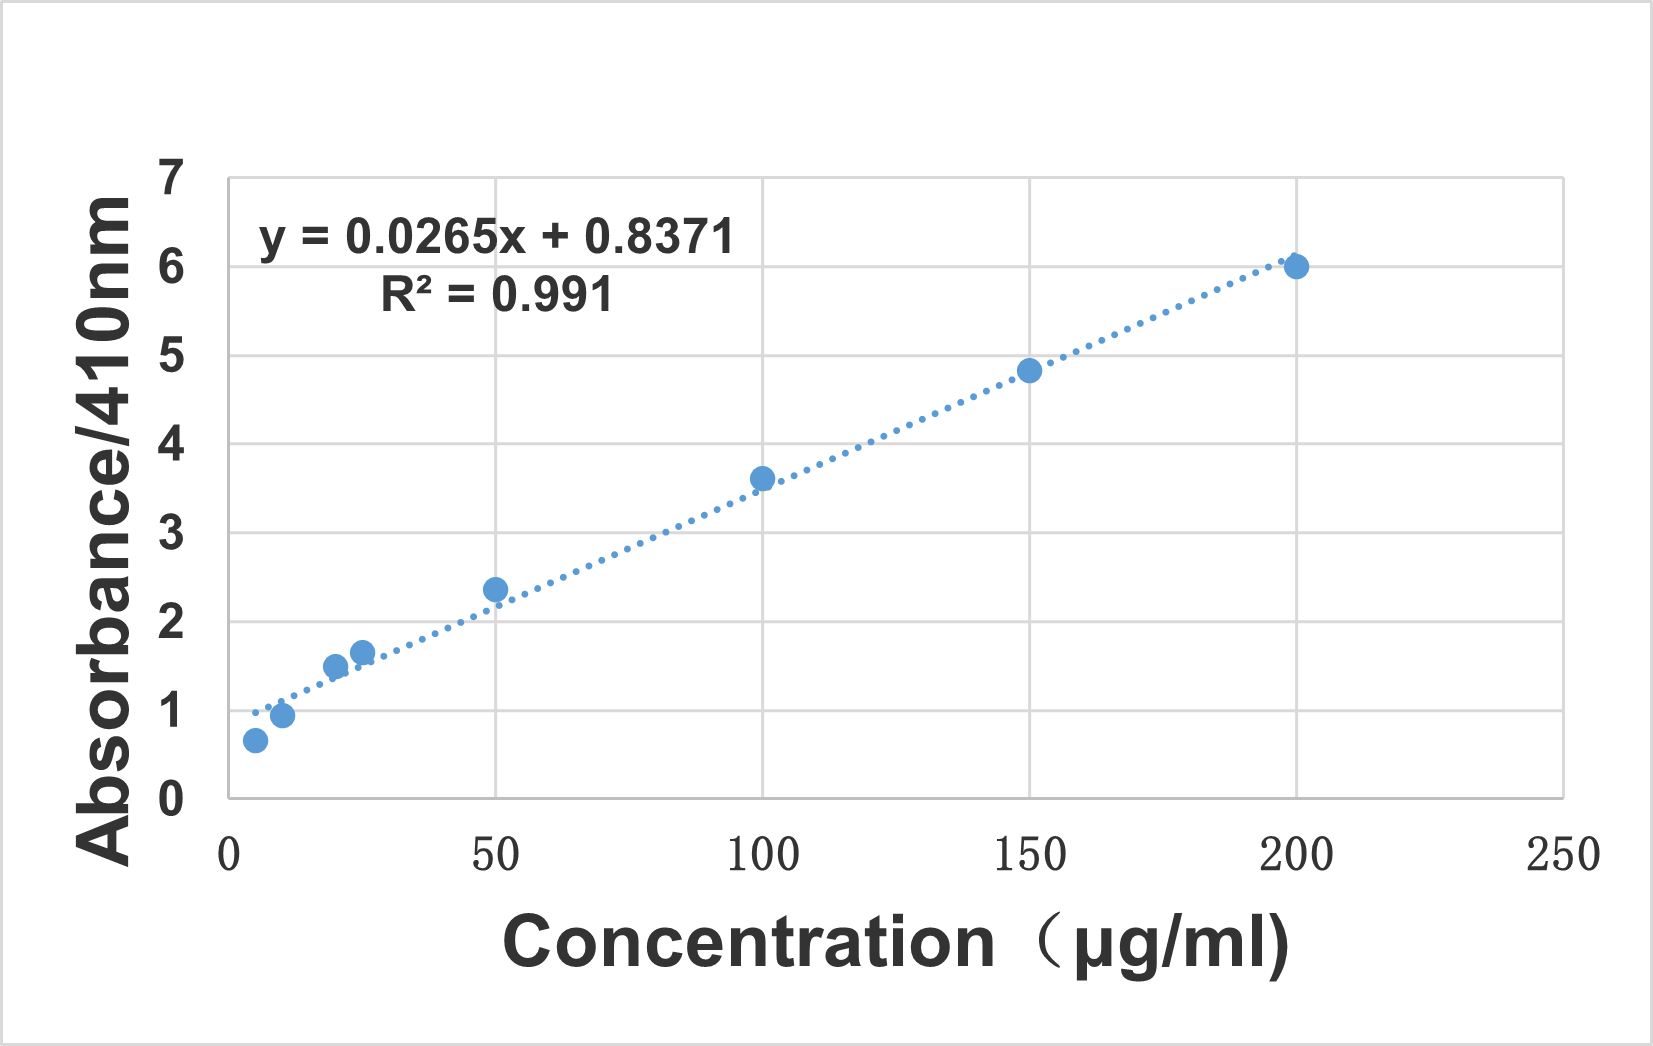


***Figure S10****. The standard curve of absorbance values for TCPP-Cu solution*


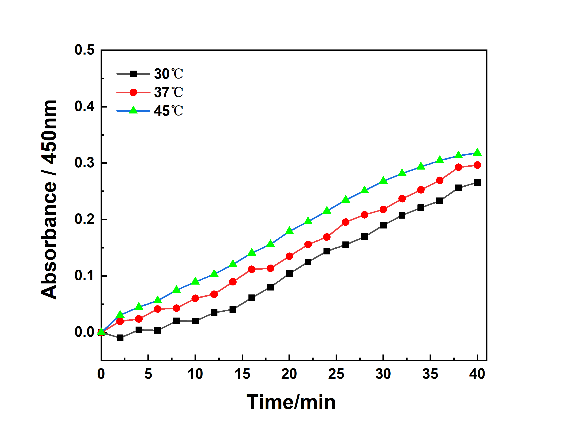


***Figure******S11.*** *Time-course absorbance curves showing the amount of hydroxyl radicals produced by the reaction of HMPB@TCPP-Cu (200 ppm) and H2O2 (500 μM) at a pH of 5.0 and varying temperatures: 30, 37, and 45 °C.*


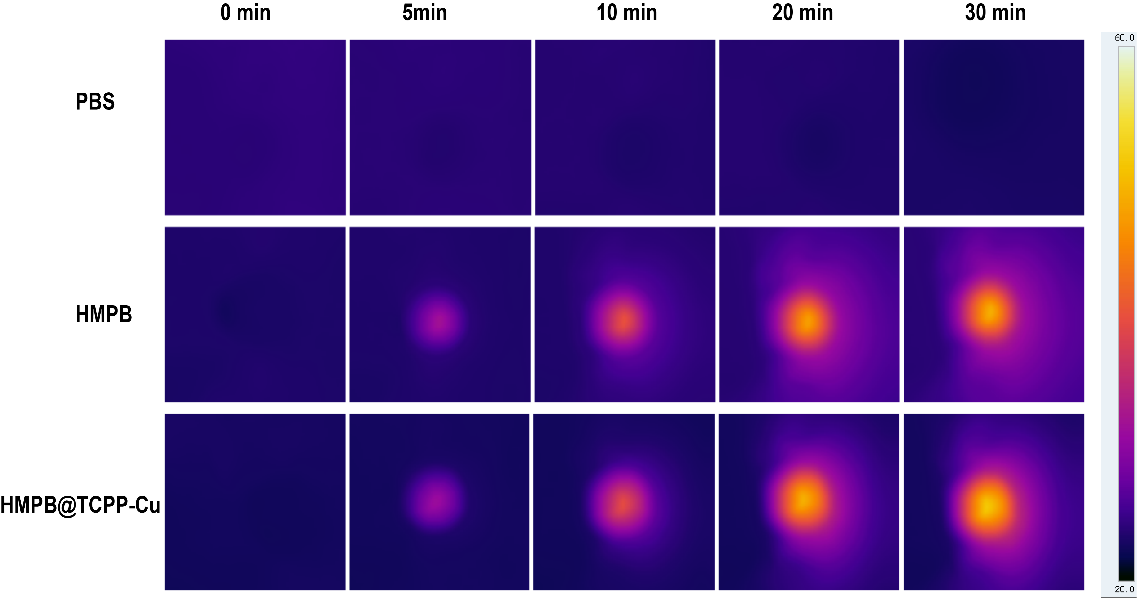


***Figure******S12.*** *Time-course thermal images of the change in solution temperature culture dishes containing HuH6 cells subjected to laser irradiation.*


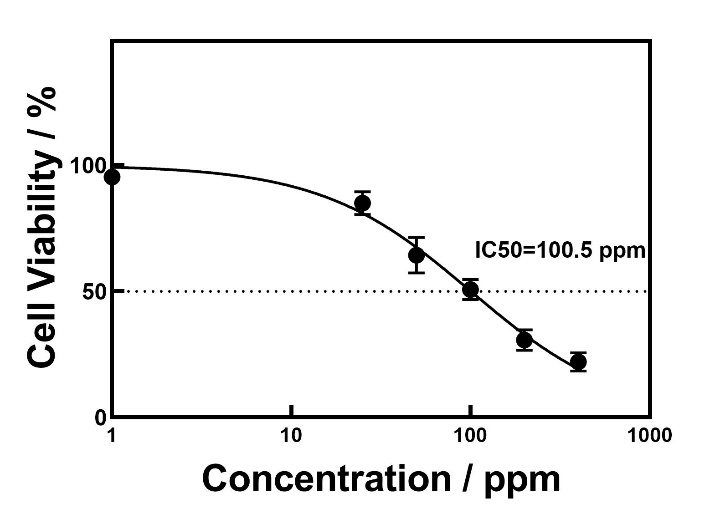


***Figure******S13****. The cell viability curve of HuH6 cells against the concentration of HMPB@TCPP-Cu was plotted, and the IC-50 value of HMPB@TCPP-Cu was calculated to be 100.5 ppm*


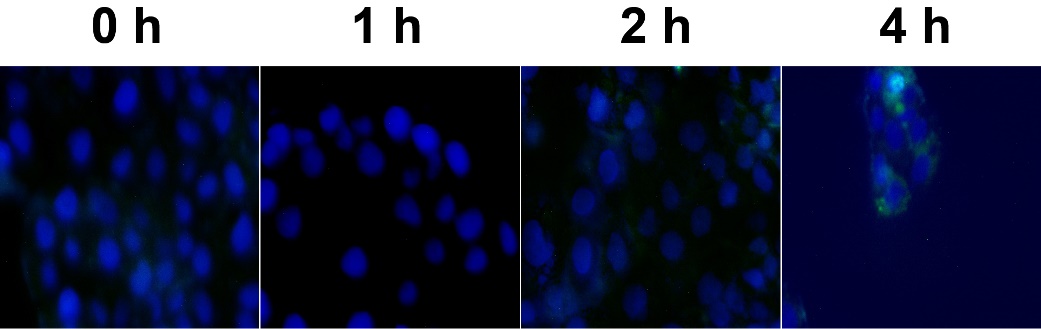


***Figure******S14.*** *Representative images showing the time-course phagocytosis of HuH6 cells on FITC-labeled HMPB@TCPP-Cu nanoparticles.*


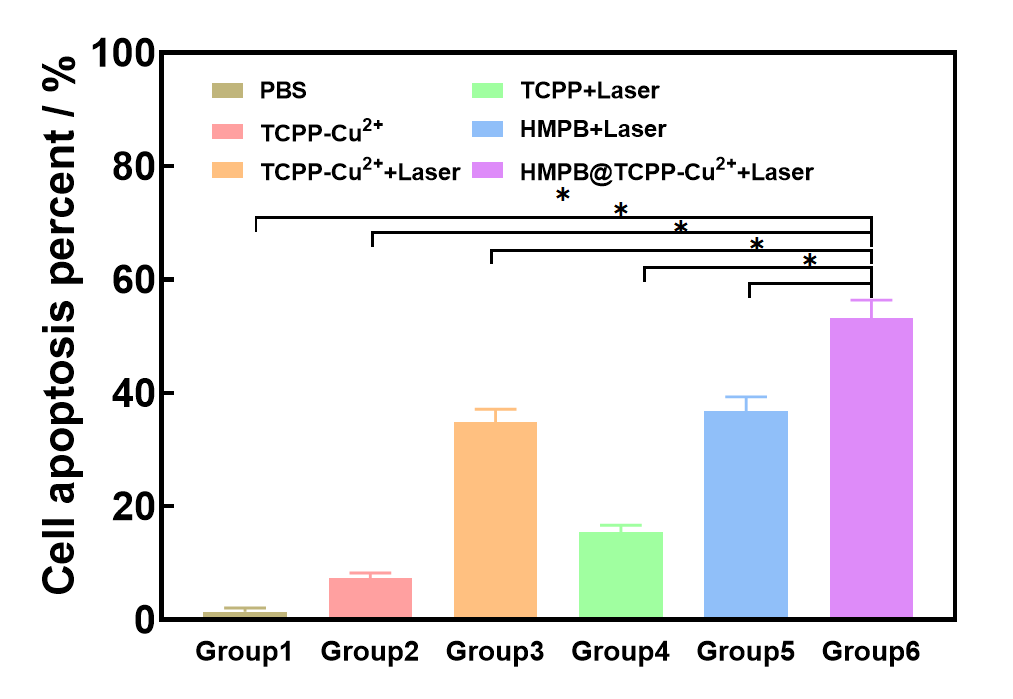


***Figure******S15****. Quantitative analysis of cell apoptosis was performed on HuH6 cells from each experimental group after Annexin V/PI staining, followed by statistical analysis of the data obtained from flow cytometry.*


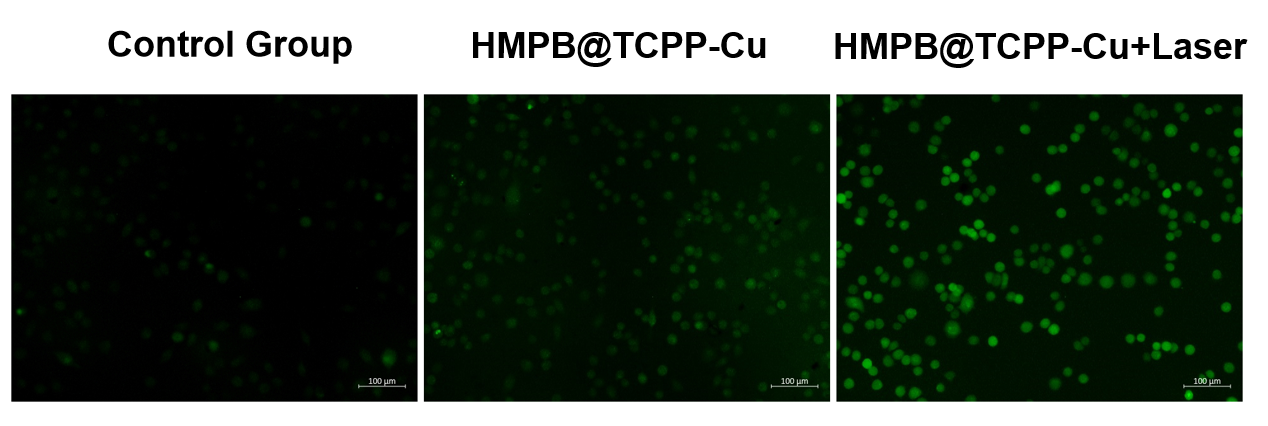


***Figure******S16****. In vitro experiment to detect the content of ROS generation at cellular level.*


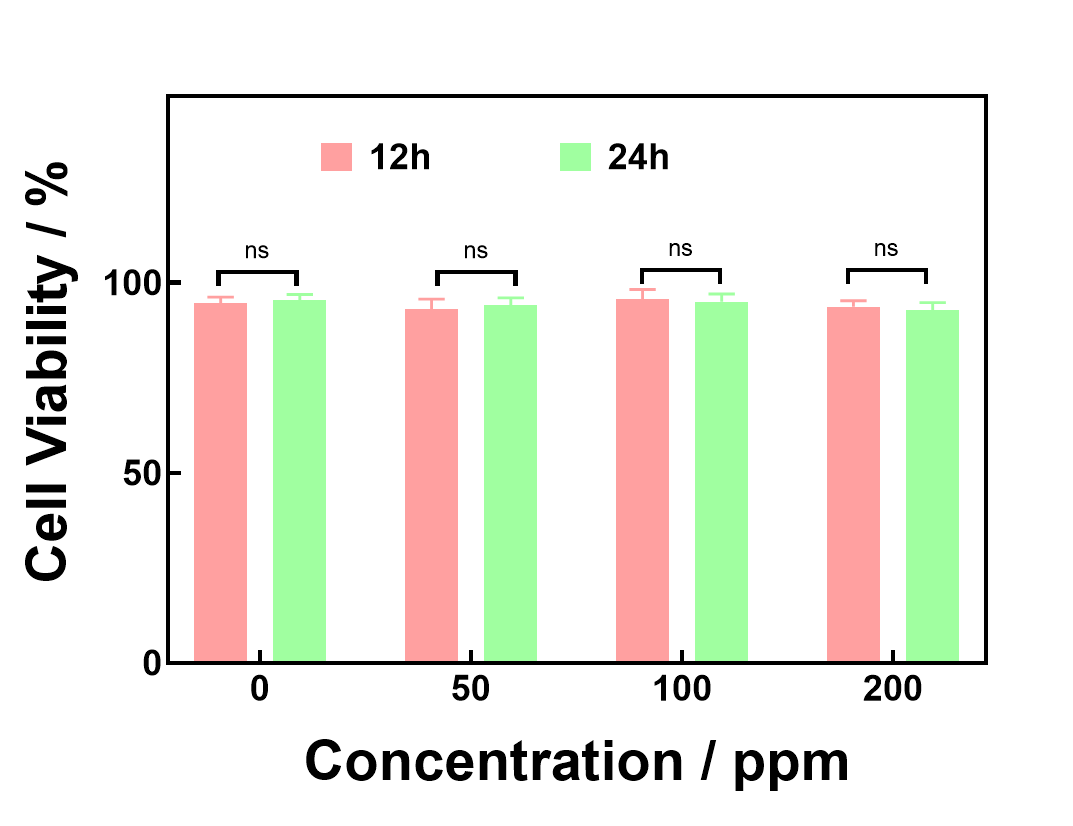


***Figure******S17****. In vitro experiment to determine the cytotoxicity of nanoparticle complexes at the cellular level.*


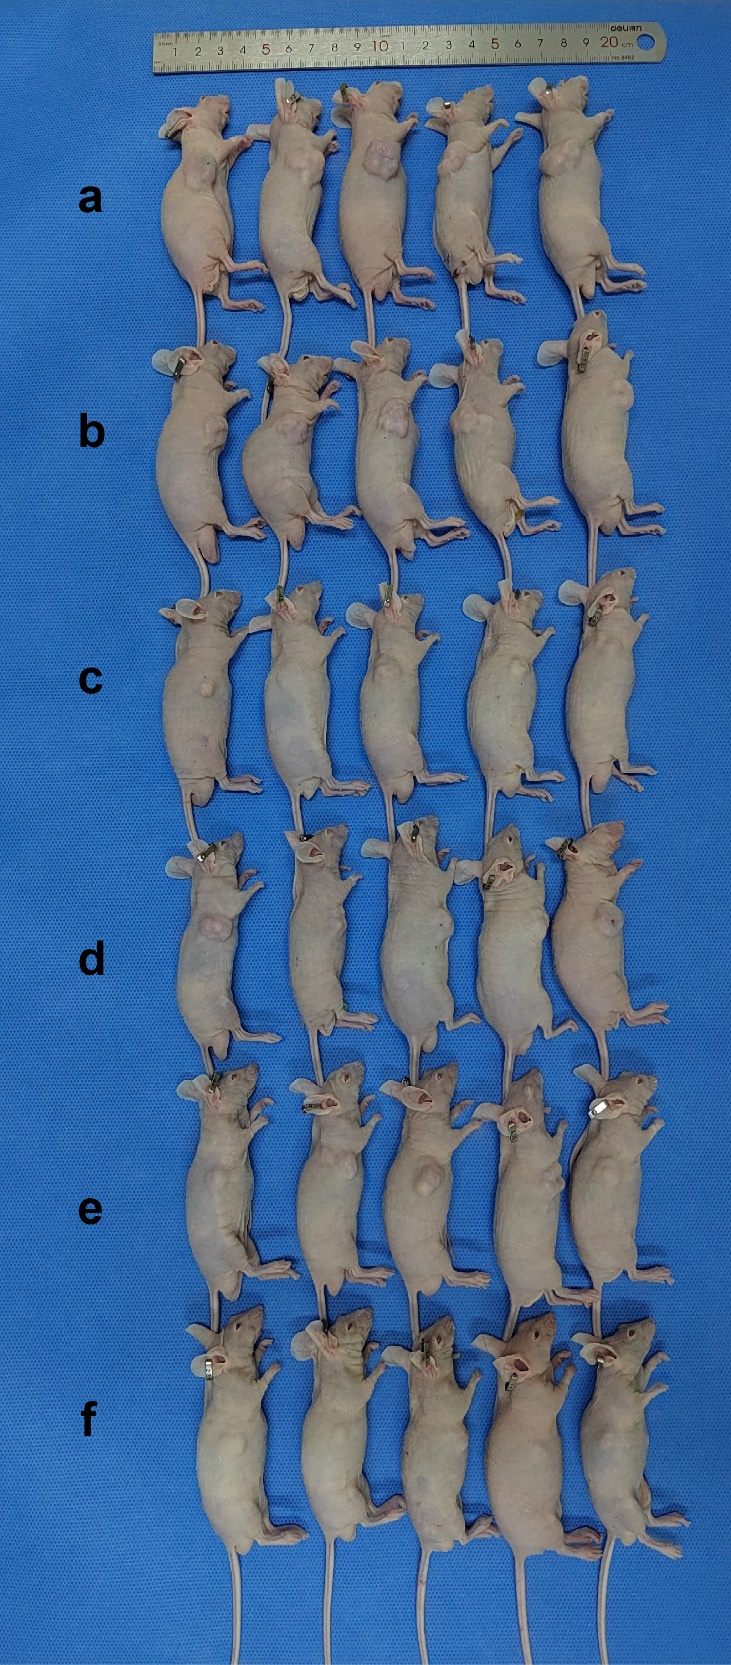


***Figure******S18.*** *Representative images of tumor-bearing nude mice treated with: A. PBS; B. TCPP-Cu; C. TCPP-Cu+Laser; D. TCPP+Laser; E. HMPB+Laser; and F. HMPB@TCPP-Cu+Laser.*


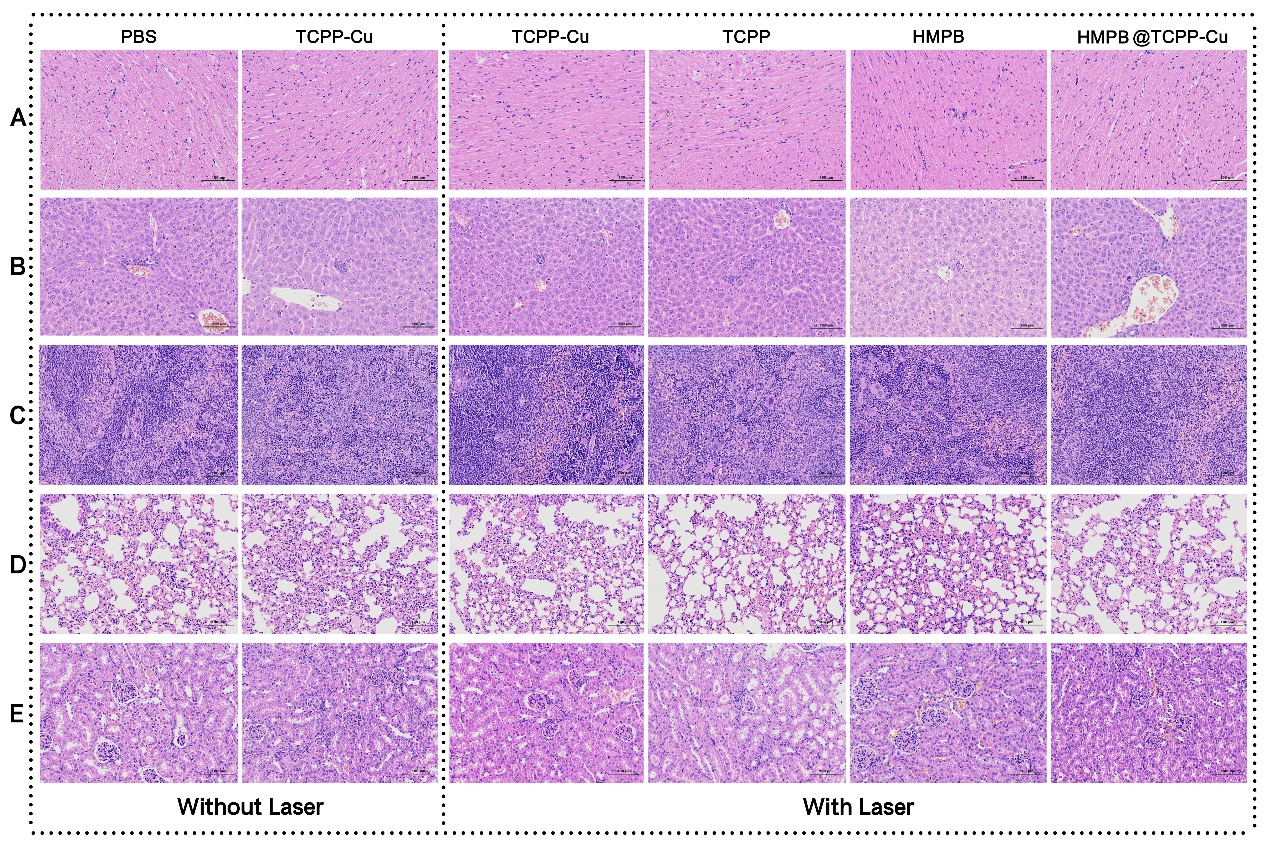


***Figure******S19.*** *Representative images of HE staining of organ section tissues of nude mice in each experimental group after treatment. A. Heart; B. Liver; C. Spleen; D. Lungs; E. Kidney.*
